# Supplementary material for: Theoretical investigation on the dimerization of the deprotonated aquo ion of Al(iii) in water
Source: Royal Society of Chemistry journal article supplement (doi:10.1039/b812485j), 2008-11-17
Supplement: b812485j.pdf [file b812485j.pdf]

## Electronic Supplementary Information

### Theoretical investigation on the dimerization of the deprotonated aquo ion of Al(III) in water

Zhaosheng Qian,<sup>a</sup> Hui Feng,<sup>a</sup> Zhenjiang Zhang,<sup>a,b</sup> Wenjing Yang,<sup>a</sup> Jing Jin,<sup>a</sup> Qiang Miao,<sup>a</sup> Lina He<sup>a</sup> and Shuping Bi<sup>\*a</sup>

<sup>a</sup> School of Chemistry and Chemical Engineering, State Key Laboratory of Coordination Chemistry of China & Key Laboratory of MOE for Life Science, Nanjing University, Nanjing 210093, China

<sup>b</sup> School of Chemistry and Chemical Engineering, Suzhou University, Suzhou 215123, China

#### 1. Species in Reaction 1, 3 and 4 for gas-phase reaction system at B3LYP/6-311+G(d,p) level

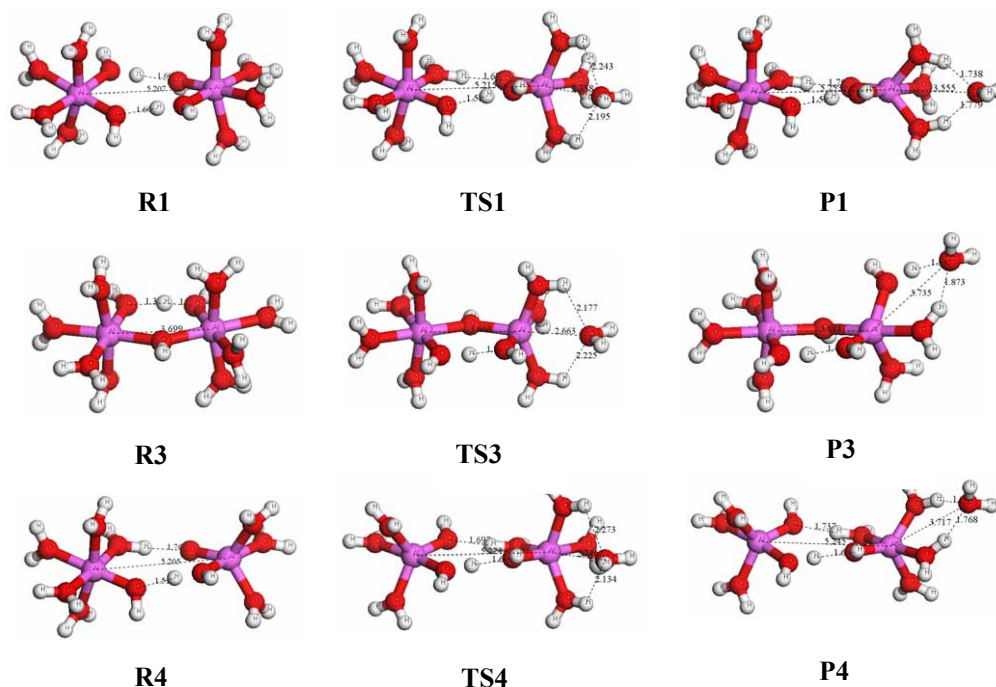

Figure S1. Species in Reaction 1, 3 and 4 for gas-phase reaction system at B3LYP/6-311+G(d,p) level

## 2. Species in Reaction 2, 5 and 6 for gas-phase reaction system at B3LYP/6-311+G(d,p) level

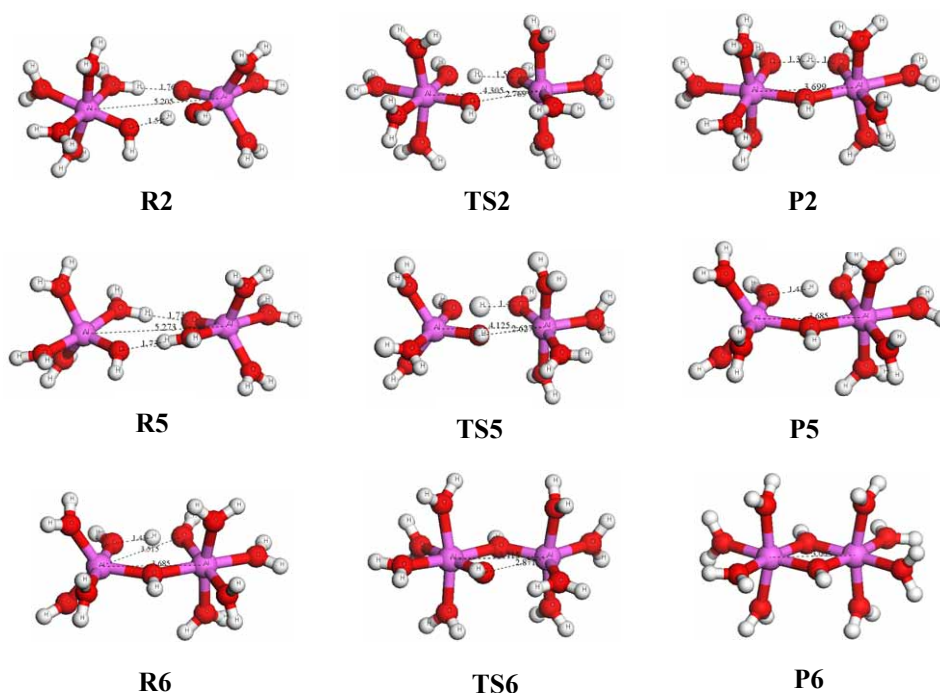

Figure S2. Species in Reaction 2, 5 and 6 for gas-phase reaction system at B3LYP/6-311+G(d,p)level

## 3. Selected structural parameters( $\text{\AA}$ ) for the complexes of Reaction 1, 3 and 4 in gas-phase reaction system

Table S1. Selected structural parameters( $\text{\AA}$ ) for the complexes of Reaction 1, 3 and 4 in gas-phase reaction system

| complex                                | R1    | TS1         | P1          | R3    | TS3         | P3          | R4    | TS4         | P4          |
|----------------------------------------|-------|-------------|-------------|-------|-------------|-------------|-------|-------------|-------------|
| $r(\text{Al}-\text{Al})$               | 5.207 | 5.215       | 5.253       | 3.699 | 3.664       | 3.684       | 5.205 | 5.224       | 5.245       |
| $r(\text{Al}-\text{O}_\text{I})$       | 1.991 | 2.758       | 3.555       | 1.994 | 2.663       | 3.735       | 1.972 | 2.746       | 3.717       |
| $r(\text{HOH}\cdots\text{O}_\text{I})$ | -     | 2.195,2.243 | 1.738,1.779 | -     | 2.177,2.225 | 1.872,1.518 | -     | 2.134,2.273 | 1.768,1.619 |
| $r(\text{Al}-\text{O}_\text{I})$       | 1.946 | 1.899       | 1.895       | 1.952 | 1.911       | 1.900       | 1.960 | 1.900       | 1.886       |

## 4. Selected structural parameters( $\text{\AA}$ ) for the complexes of Reaction 2, 5 and 6 in gas-phase reaction system

Table S2. Selected structural parameters( $\text{\AA}$ ) for the complexes of Reaction 2, 5 and 6 in gas-phase reaction system

| complex                                   | R2          | TS2    | P2     | R5          | TS5    | P5     | R6    | TS6   | P6     |
|-------------------------------------------|-------------|--------|--------|-------------|--------|--------|-------|-------|--------|
| $r(\text{Al}-\text{Al})$                  | 5.205       | 4.305  | 3.699  | 5.273       | 4.125  | 3.685  | 3.685 | 3.415 | 3.005  |
| $r(\text{Al}_\text{A}-\text{O}_\text{A})$ | 4.165       | 2.769  | 1.994  | 4.138       | 2.627  | 1.979  | 3.515 | 2.871 | 1.908  |
| $r(\text{HOH}\cdots\text{OH})$            | 1.511,1.763 | 1.563  | 1.347  | 1.732,1.732 | 1.446  | 1.436  | 1.436 | -     | -      |
| $\square\text{Al}-\text{O}-\text{Al}$     | 117.3°      | 137.7° | 140.4° | 121.6°      | 136.8° | 141.8° | 80.3° | 91.2° | 104.8° |

## 5. The calculated energies of each reaction for the gas-phase reaction system, and supermolecular reaction system in gas phase and in aqueous solution

**Table S3.** The energies of each reaction for the gas-phase reaction system, and supermolecular reaction system in gas phase and in aqueous solution

| complex               | E (g) <sup>a</sup> | H (g) <sup>a</sup> | G (g) <sup>a</sup> | E <sub>s</sub> (g) <sup>b</sup> | H <sub>s</sub> (g) <sup>b</sup> | G <sub>s</sub> (g) <sup>b</sup> | E <sub>s</sub> (aq) <sup>c</sup> | H <sub>s</sub> (aq) <sup>c</sup> | G <sub>s</sub> (aq) <sup>c</sup> |
|-----------------------|--------------------|--------------------|--------------------|---------------------------------|---------------------------------|---------------------------------|----------------------------------|----------------------------------|----------------------------------|
| R1/R <sub>s</sub> 1   | -1399.857351       | -1399.856407       | -1399.938337       | -1705.789062                    | -1705.788118                    | -1705.892300                    | -1706.672445                     | -1706.671501                     | -1706.760988                     |
| TS1/TS <sub>s</sub> 1 | -1399.847986       | -1399.847041       | -1399.928983       | -1705.783081                    | -1705.782137                    | -1705.885567                    | -1706.658152                     | -1706.657208                     | -1706.748045                     |
| P1/P <sub>s</sub> 1   | -1399.861697       | -1399.860753       | -1399.944752       | -1705.800928                    | -1705.799984                    | -1705.903640                    | -1706.663266                     | -1706.662322                     | -1706.750636                     |
| R2/R <sub>s</sub> 2   | -1323.373313       | -1323.372369       | -1323.450311       | -1629.324034                    | -1629.323090                    | -1629.421263                    | -1630.208639                     | -1630.207694                     | -1630.292029                     |
| TS2/TS <sub>s</sub> 2 | -1323.340139       | -1323.339194       | -1323.416300       | -1629.291963                    | -1629.291019                    | -1629.387293                    | -1630.192480                     | -1630.191536                     | -1630.276115                     |
| P2/P <sub>s</sub> 2   | -1323.349114       | -1323.348170       | -1323.424819       | -1629.338614                    | -1629.304731                    | -1629.303787                    | -1630.217959                     | -1630.217015                     | -1630.301801                     |
| R3/R <sub>s</sub> 3   | -1323.349114       | -1323.348170       | -1323.424819       | -1629.299256                    | -1629.298312                    | -1629.394722                    | -1630.219067                     | -1630.218123                     | -1630.301974                     |
| TS3/TS <sub>s</sub> 3 | -1323.339760       | -1323.338816       | -1323.414889       | -1629.293350                    | -1629.292405                    | -1629.388243                    | -1630.203491                     | -1630.202547                     | -1630.289599                     |
| P3/P <sub>s</sub> 3   | -1323.360856       | -1323.359912       | -1323.436498       | -1629.311369                    | -1629.310425                    | -1629.407768                    | -1630.209320                     | -1630.208376                     | -1630.290848                     |
| R4/R <sub>s</sub> 4   | -1323.373313       | -1323.372369       | -1323.450311       | -1629.316890                    | -1629.315946                    | -1629.416110                    | -1630.201729                     | -1630.200784                     | -1630.287708                     |
| TS4/TS <sub>s</sub> 4 | -1323.358907       | -1323.357962       | -1323.436738       | -1629.309731                    | -1629.308787                    | -1629.408532                    | -1630.184462                     | -1630.183518                     | -1630.272188                     |
| P4/P <sub>s</sub> 4   | -1323.383138       | -1323.382194       | -1323.460707       | -1629.323720                    | -1629.322776                    | -1629.424039                    | -1630.192734                     | -1630.191789                     | -1630.279770                     |
| R5/R <sub>s</sub> 5   | -1246.884250       | -1246.883306       | -1246.958466       | -1552.850655                    | -1552.849711                    | -1552.943345                    | -1553.738778                     | -1553.737834                     | -1553.818729                     |
| TS5/TS <sub>s</sub> 5 | -1246.855674       | -1246.855674       | -1246.926864       | -1552.821185                    | -1552.820241                    | -1552.912238                    | -1553.724927                     | -1553.723982                     | -1553.807810                     |
| P5/P <sub>s</sub> 5   | -1246.860755       | -1246.859810       | -1246.931838       | -1552.831988                    | -1552.831044                    | -1552.922039                    | -1553.748495                     | -1553.747551                     | -1553.828145                     |
| R6/R <sub>s</sub> 6   | -1246.860755       | -1246.859810       | -1246.931838       | -1552.833305                    | -1552.832361                    | -1552.922571                    | -1553.752350                     | -1553.751406                     | -1553.831098                     |
| TS6/TS <sub>s</sub> 6 | -1246.837986       | -1246.837042       | -1246.908377       | -1552.812847                    | -1552.811903                    | -1552.901610                    | -1553.741315                     | -1553.740371                     | -1553.818832                     |
| P6/P <sub>s</sub> 6   | -1246.869982       | -1246.869038       | -1246.938974       | -1552.835656                    | -1552.834712                    | -1552.925278                    | -1553.772759                     | -1553.771815                     | -1553.852743                     |

<sup>a</sup> The relative energies for the gas-phase reaction system. <sup>b</sup> The relative energies for supermolecular reaction system in gas phase.

<sup>c</sup> The relative energies for the supermolecular reaction system in aqueous solution.

## 6. Cartesian coordinates of all supermolecular geometries optimized at B3LYP/6-311+G(d,p)

### R<sub>s</sub>1

|    |             |             |             |
|----|-------------|-------------|-------------|
| O  | 3.24698400  | -0.09103100 | 1.66741400  |
| O  | 4.48718400  | -0.63629300 | -0.54559400 |
| O  | 4.17339500  | 1.98617100  | -0.02135200 |
| O  | 2.97089400  | 0.93538200  | -2.12335800 |
| O  | -0.87438700 | 0.91472200  | 0.89578400  |
| O  | 1.69120500  | -0.92541200 | -0.62622800 |
| Al | 2.85238400  | 0.42905100  | -0.18725800 |
| O  | -2.28364500 | 1.27201400  | -1.40932900 |
| O  | -3.66762900 | 0.78086600  | 0.79540900  |
| O  | -3.39940500 | -1.22106400 | -1.07066300 |
| O  | -2.34194800 | -1.34934600 | 1.49878400  |
| Al | -2.17124900 | -0.12282700 | -0.02421000 |
| O  | -0.77340300 | -1.07423100 | -0.83945600 |
| H  | 3.36240000  | 1.73526900  | -2.50543000 |
| H  | 2.44981300  | 0.48673300  | -2.80359100 |
| H  | 5.12410500  | 1.91437400  | -0.19815000 |

|   |             |             |             |
|---|-------------|-------------|-------------|
| H | 5.03334000  | -1.09194400 | 0.14867600  |
| H | 4.81837600  | -0.87226200 | -1.42383900 |
| H | 4.01112400  | -0.63455200 | 1.97579800  |
| H | 2.81157700  | 0.32125000  | 2.42464700  |
| H | 2.03755500  | -1.82403000 | -0.65770100 |
| H | 0.31183300  | -0.97596300 | -0.72234800 |
| H | -0.96013000 | -1.81119500 | -1.45046700 |
| H | -3.11174500 | -1.36094800 | 2.12315900  |
| H | -1.74675700 | -2.08287300 | 1.70153300  |
| H | -4.35665100 | -1.10010500 | -1.13093800 |
| H | -4.02158100 | 1.65286500  | 0.48687200  |
| H | -4.17722300 | 0.44134900  | 1.57203500  |
| H | -2.85128100 | 2.07509400  | -1.29984200 |
| H | -2.14691500 | 1.11781200  | -2.35365200 |
| H | -1.03661700 | 1.22935100  | 1.79334700  |
| H | -3.12677500 | -2.01773200 | -1.61171400 |
| H | 4.04669100  | 2.78112000  | 0.51831300  |
| H | 1.51140100  | 2.47211800  | 0.17197400  |
| O | 1.48765100  | 1.52152500  | 0.32037400  |
| H | 0.12204600  | 1.16171100  | 0.62458400  |
| O | 5.53365300  | -1.59505900 | 1.73895100  |
| H | 5.54116900  | -2.54275300 | 1.94993300  |
| H | 6.36811500  | -1.25420300 | 2.10090500  |
| H | -4.54462000 | -0.42223200 | 3.79869700  |
| O | -4.58490400 | -0.72200200 | 2.87577000  |
| H | -5.40863400 | -1.23358500 | 2.81917900  |
| H | -3.95001900 | 3.95293200  | -0.19758800 |
| O | -4.15516400 | 3.07584700  | -0.55967200 |
| H | -4.97729100 | 3.20250000  | -1.06147200 |
| H | -2.25340400 | -4.06095400 | -2.13706500 |
| O | -2.19560600 | -3.13231800 | -2.41256100 |
| H | -2.25366600 | -3.15821900 | -3.38095300 |

**TS<sub>1</sub>**

|    |             |             |             |
|----|-------------|-------------|-------------|
| O  | 3.31408400  | -0.01246200 | 1.62751400  |
| O  | 4.42293500  | -0.83067700 | -0.49869800 |
| O  | 4.51829500  | 2.21796400  | -0.26918900 |
| O  | 3.14192700  | 0.83154500  | -2.00614500 |
| O  | -0.87911900 | 0.91524300  | 0.82376900  |
| O  | 1.60495000  | -1.13424700 | -0.57744700 |
| Al | 2.77418100  | 0.16449700  | -0.20925300 |

|    |             |             |             |
|----|-------------|-------------|-------------|
| O  | -2.21906300 | 1.19484700  | -1.48432600 |
| O  | -3.67424900 | 0.92146400  | 0.72292900  |
| O  | -3.50937300 | -1.18713000 | -1.00847500 |
| O  | -2.45352000 | -1.20282800 | 1.57905700  |
| Al | -2.23084800 | -0.10736900 | -0.02207100 |
| O  | -0.90419100 | -1.21144700 | -0.76284000 |
| H  | 3.69862900  | 1.63193500  | -2.05277700 |
| H  | 2.57695100  | 0.76294600  | -2.78911800 |
| H  | 5.47966000  | 2.09245300  | -0.28300700 |
| H  | 5.00860800  | -1.20400500 | 0.21331400  |
| H  | 4.78986900  | -1.03270200 | -1.37223900 |
| H  | 4.10733200  | -0.49954400 | 1.96791000  |
| H  | 2.98217500  | 0.59782000  | 2.30053500  |
| H  | 1.93864200  | -2.03208500 | -0.69154700 |
| H  | 0.15278800  | -1.14923200 | -0.66428300 |
| H  | -1.12889500 | -1.97406800 | -1.33119500 |
| H  | -3.22638100 | -1.12373200 | 2.19995100  |
| H  | -1.95178100 | -2.00411800 | 1.78369500  |
| H  | -4.46349800 | -1.03061800 | -1.04542000 |
| H  | -3.94476100 | 1.81091000  | 0.37705200  |
| H  | -4.19478600 | 0.67040400  | 1.52592200  |
| H  | -2.72127900 | 2.04602000  | -1.40117900 |
| H  | -2.22369100 | 0.93530800  | -2.41701800 |
| H  | -0.97459700 | 1.14843200  | 1.75642200  |
| H  | -3.28371400 | -2.03176500 | -1.50245400 |
| H  | 4.40745600  | 3.13715600  | 0.01906900  |
| H  | 1.66165800  | 2.32263300  | 0.12055700  |
| O  | 1.52550200  | 1.37742200  | 0.24356200  |
| H  | 0.12201700  | 1.10993100  | 0.53977900  |
| O  | 5.56999100  | -1.49942000 | 1.82860700  |
| H  | 5.56395200  | -2.40888000 | 2.17106300  |
| H  | 6.42732500  | -1.13365000 | 2.10453600  |
| H  | -4.57218600 | -0.02115200 | 3.81332900  |
| O  | -4.63903000 | -0.38022500 | 2.91242500  |
| H  | -5.48766700 | -0.85438700 | 2.89874300  |
| H  | -3.66188500 | 4.05353400  | -0.39953100 |
| O  | -3.93729600 | 3.18110000  | -0.72671800 |
| H  | -4.74280400 | 3.35419700  | -1.24316900 |
| H  | -2.55499900 | -4.14431300 | -1.89168100 |
| O  | -2.42771400 | -3.23831500 | -2.21834700 |
| H  | -2.48049300 | -3.31476500 | -3.18546700 |

**P<sub>5</sub>I**

|    |             |             |             |
|----|-------------|-------------|-------------|
| O  | 3.36042300  | 1.94969700  | -0.53315900 |
| O  | 4.33687000  | -0.07578800 | 0.71157400  |
| O  | 5.58400200  | -2.33610400 | -0.34505100 |
| O  | 3.41057900  | -1.26525000 | -1.38263500 |
| O  | -1.08776100 | 0.88482700  | -0.95803700 |
| O  | 1.59078800  | -0.21775100 | 0.99857400  |
| Al | 2.68902200  | 0.17195800  | -0.35604100 |
| O  | -2.25940700 | -1.56102600 | -1.14508100 |
| O  | -3.87974000 | 0.50786400  | -0.86880000 |
| O  | -3.47708300 | -1.11572200 | 1.30185600  |
| O  | -2.65672900 | 1.54318600  | 1.18864800  |
| Al | -2.33112200 | -0.07003500 | 0.11952200  |
| O  | -0.89285300 | -0.67616500 | 1.17827100  |
| H  | 4.23814300  | -1.78574700 | -1.15773200 |
| H  | 2.97554900  | -1.65221200 | -2.15494400 |
| H  | 5.58983500  | -3.22083600 | 0.05466100  |
| H  | 4.89616700  | 0.67398900  | 1.01827300  |
| H  | 4.90641400  | -0.87364000 | 0.63910700  |
| H  | 4.16878500  | 2.32843800  | -0.07959000 |
| H  | 2.91732800  | 2.63104400  | -1.05747500 |
| H  | 1.99269400  | -0.35815500 | 1.86364200  |
| H  | 0.13435900  | -0.46707200 | 1.07564000  |
| H  | -1.03177000 | -1.24149300 | 1.96461800  |
| H  | -3.48832800 | 2.08173700  | 1.13726000  |
| H  | -2.11381700 | 1.85325500  | 1.92595600  |
| H  | -4.41730800 | -1.29519700 | 1.16547500  |
| H  | -4.17057200 | 0.10051100  | -1.72315900 |
| H  | -4.46540800 | 1.26234800  | -0.61153100 |
| H  | -2.82055200 | -1.59129200 | -1.96096100 |
| H  | -1.92851400 | -2.44859300 | -0.95324400 |
| H  | -1.27156500 | 1.79763600  | -1.21253600 |
| H  | -3.16491700 | -1.57189500 | 2.13340700  |
| H  | 6.44957400  | -2.24822300 | -0.77682600 |
| H  | 1.47278900  | 0.59650500  | -2.46923400 |
| O  | 1.33272000  | 0.47714600  | -1.52330500 |
| H  | -0.08279300 | 0.67374000  | -1.19946800 |
| O  | 5.51203200  | 2.43309300  | 0.92014800  |
| H  | 5.48997300  | 2.99269400  | 1.71330300  |
| H  | 6.37647100  | 2.60658900  | 0.51266300  |

|   |             |             |             |
|---|-------------|-------------|-------------|
| H | -5.04712600 | 3.51550700  | 0.03077800  |
| O | -5.00880500 | 2.62558200  | 0.41816400  |
| H | -5.83298300 | 2.54228200  | 0.92549500  |
| H | -3.94842900 | -0.78333000 | -3.94596800 |
| O | -4.14730100 | -1.08543500 | -3.04495600 |
| H | -4.91138200 | -1.67702400 | -3.14509100 |
| H | -2.21111400 | -1.84701900 | 4.20896900  |
| O | -2.12729300 | -2.18448900 | 3.30278100  |
| H | -2.07773800 | -3.14886800 | 3.40131000  |

**R<sub>2</sub>**

|    |             |             |             |
|----|-------------|-------------|-------------|
| O  | -2.47177700 | -1.70312500 | -1.13360900 |
| O  | -3.76377200 | -1.06454600 | 1.00855800  |
| O  | -3.73165000 | 0.71292800  | -1.20957100 |
| O  | -2.83259600 | 1.42957800  | 1.13905800  |
| O  | -0.95297600 | 0.57940500  | -0.92477200 |
| O  | -1.12595500 | -0.74041800 | 1.28796500  |
| Al | -2.38306800 | -0.09288200 | -0.02240200 |
| O  | 3.68485500  | 1.51819400  | 0.78133100  |
| O  | 1.57302200  | 0.96437300  | -0.71657500 |
| O  | 4.28416000  | -1.03241300 | 1.20537900  |
| O  | 3.63236000  | -0.72962300 | -1.29552800 |
| Al | 2.82701700  | -0.06491300 | 0.27576600  |
| O  | 1.51799200  | -0.91826100 | 1.09035100  |
| H  | -3.48674600 | 2.13806900  | 0.90433800  |
| H  | -2.28855600 | 1.72620000  | 1.88149100  |
| H  | -4.24518700 | 1.53615800  | -1.00699700 |
| H  | -4.16559000 | -1.93044400 | 0.73647500  |
| H  | -4.31632100 | -0.65878500 | 1.69171600  |
| H  | -3.08317400 | -2.47393300 | -1.01267500 |
| H  | -1.80916000 | -1.90538400 | -1.80782200 |
| H  | -1.38340500 | -1.29318900 | 2.03789500  |
| H  | -0.12128400 | -0.76153000 | 1.18561100  |
| H  | 1.72258800  | -1.71181100 | 1.59744900  |
| H  | 4.46876500  | -1.28557200 | -1.32072100 |
| H  | 3.30724700  | -0.56692200 | -2.19326100 |
| H  | 5.01365700  | -1.50338300 | 0.72634100  |
| H  | 1.73113300  | 1.89204300  | -0.96057800 |
| H  | 0.54780400  | 0.76823600  | -0.76790600 |
| H  | 3.48926200  | 2.44649700  | 0.39576100  |
| H  | 4.47650600  | 1.55271300  | 1.33905400  |

|   |             |             |             |
|---|-------------|-------------|-------------|
| H | -1.17510800 | 1.08487000  | -1.71526600 |
| H | 4.34798500  | -1.23762800 | 2.15108100  |
| H | -4.08408400 | 0.30543400  | -2.01338000 |
| H | 6.70644600  | -1.75832900 | -0.97952300 |
| O | 5.82254100  | -2.09901000 | -0.75968700 |
| H | 5.88326700  | -3.06073000 | -0.88931500 |
| O | 3.01406600  | 3.67698100  | -0.40373900 |
| H | 2.66503000  | 4.43490900  | 0.09165300  |
| H | 3.61001600  | 4.06071200  | -1.06764400 |
| H | -4.58268700 | 3.82289000  | -0.41534600 |
| O | -4.74174400 | 2.93804200  | -0.04807700 |
| H | -5.64812600 | 2.97362300  | 0.30018300  |
| O | -4.39648000 | -3.38139500 | -0.22858500 |
| H | -5.23504400 | -3.50621900 | -0.70312400 |
| H | -4.21292900 | -4.24284000 | 0.18078600  |

## TS<sub>2</sub>

|    |             |             |             |
|----|-------------|-------------|-------------|
| O  | -2.41392900 | -1.75390400 | -0.83665600 |
| O  | -3.77471300 | -0.44976200 | 0.90304600  |
| O  | -2.88650900 | 0.85513700  | -1.46141600 |
| O  | -2.22532000 | 1.73096400  | 0.89503300  |
| O  | -0.30515400 | 0.08034600  | -0.61617000 |
| O  | -1.21001700 | -0.71279900 | 1.64116300  |
| Al | -2.01116300 | -0.04720100 | 0.05831000  |
| O  | 2.66325900  | 1.48753400  | 1.32180300  |
| O  | 2.64168000  | 1.06829900  | -1.18175800 |
| O  | 4.07439900  | -0.79213300 | 0.57628800  |
| O  | 2.12715200  | -1.49171500 | -1.05295000 |
| Al | 2.30530600  | -0.11317200 | 0.28631500  |
| O  | 1.32884700  | -0.80773100 | 1.58821200  |
| H  | -2.70617200 | 2.50060400  | 0.49803700  |
| H  | -1.85492900 | 1.98002400  | 1.75232100  |
| H  | -3.27860600 | 1.76501000  | -1.42719200 |
| H  | -4.34617800 | -1.23371200 | 0.70492000  |
| H  | -4.25219900 | 0.14429600  | 1.49852600  |
| H  | -3.22572700 | -2.31155100 | -0.69122100 |
| H  | -1.80846500 | -2.22155200 | -1.42441500 |
| H  | -1.63745300 | -1.18312600 | 2.36820200  |
| H  | -0.18708900 | -0.79609500 | 1.68104100  |
| H  | 1.72795500  | -1.37061500 | 2.26217600  |
| H  | 2.78959800  | -2.22150400 | -1.18042200 |



|   |             |             |             |
|---|-------------|-------------|-------------|
| H | 1.23366400  | -1.77842400 | -1.28676200 |
| H | 4.41964300  | -1.61917300 | 0.13637600  |
| H | 2.74888300  | 0.75284400  | -2.09141100 |
| H | 3.05447500  | 1.97415600  | -1.08547200 |
| H | 3.10200300  | 2.31845000  | 1.01023900  |
| H | 2.42018300  | 1.55675500  | 2.25700200  |
| H | -0.25660100 | 0.65554900  | -1.38759600 |
| H | 4.73088000  | -0.45938600 | 1.20713000  |
| H | -3.21904100 | 0.39929200  | -2.24738000 |
| H | 5.01762500  | -3.01516000 | -1.64768900 |
| O | 4.38138700  | -2.98487400 | -0.91281200 |
| H | 4.43541100  | -3.86421900 | -0.50149700 |
| O | 3.74794300  | 3.34440100  | -0.33034200 |
| H | 3.36298700  | 4.22447300  | -0.47572400 |
| H | 4.70850000  | 3.48233100  | -0.39157400 |
| H | -3.33740700 | 4.13807500  | -1.17409000 |
| O | -3.68032400 | 3.34205400  | -0.73643700 |
| H | -4.61034300 | 3.54833300  | -0.54526100 |
| O | -4.77549800 | -2.77825700 | -0.06426700 |
| H | -5.54570400 | -2.81287400 | -0.65565800 |
| H | -4.85536900 | -3.56841700 | 0.49537900  |

**P<sub>2</sub>**

|    |             |             |             |
|----|-------------|-------------|-------------|
| O  | -2.11607900 | -1.60367100 | -1.09598500 |
| O  | -3.72724900 | -0.58268600 | 0.63579700  |
| O  | -2.46020100 | 1.07460300  | -1.30229800 |
| O  | -2.10363200 | 1.51542000  | 1.22719500  |
| O  | -0.02573200 | 0.13770500  | -0.38374300 |
| O  | -1.22094800 | -1.00987600 | 1.62961100  |
| Al | -1.86394200 | -0.11035000 | 0.15391400  |
| O  | 2.07004900  | 1.71720300  | 0.95391200  |
| O  | 2.41528800  | 0.76917800  | -1.43929800 |
| O  | 3.72935700  | -0.40784700 | 0.75509100  |
| O  | 2.07675700  | -1.79812900 | -0.73747000 |
| Al | 1.83092900  | -0.09343400 | 0.23194600  |
| O  | 1.15826000  | -0.75045700 | 1.77530000  |
| H  | -2.53901700 | 2.35434900  | 0.92883900  |
| H  | -1.90763900 | 1.56101200  | 2.17395000  |
| H  | -2.83994000 | 1.98063900  | -1.14137300 |
| H  | -4.24496000 | -1.33937300 | 0.25934900  |
| H  | -4.26672700 | -0.13811300 | 1.30536400  |

|   |             |             |             |
|---|-------------|-------------|-------------|
| H | -2.92665600 | -2.18859300 | -1.11833800 |
| H | -1.47256600 | -1.93329500 | -1.73585200 |
| H | -1.70652000 | -1.58245500 | 2.23565700  |
| H | -0.11928300 | -0.96626400 | 1.82214400  |
| H | 1.67524200  | -1.16003400 | 2.47795900  |
| H | 2.95910600  | -2.26742100 | -0.75744200 |
| H | 1.39637400  | -2.48402400 | -0.72615900 |
| H | 4.27580800  | -1.18139800 | 0.46802800  |
| H | 2.62104400  | 0.28114000  | -2.25005400 |
| H | 2.89492000  | 1.64119800  | -1.45483900 |
| H | 2.56817200  | 2.45177500  | 0.51614200  |
| H | 1.86361800  | 1.95257000  | 1.86948700  |
| H | 0.00008100  | 0.71822700  | -1.15592500 |
| H | 4.23691100  | 0.10991800  | 1.39600100  |
| H | -2.80579200 | 0.74649300  | -2.14561600 |
| H | 5.25646500  | -2.70294200 | -1.13705300 |
| O | 4.59365600  | -2.69410400 | -0.42623400 |
| H | 4.78330300  | -3.48952600 | 0.09947500  |
| O | 3.47985000  | 3.17704500  | -0.86356700 |
| H | 3.15326900  | 3.99168700  | -1.27989500 |
| H | 4.43728200  | 3.31754900  | -0.77295200 |
| H | -2.95917600 | 4.26750000  | -0.49309400 |
| O | -3.34441800 | 3.40541600  | -0.26494400 |
| H | -4.29529000 | 3.58182000  | -0.16549200 |
| O | -4.49975200 | -2.76432200 | -0.76915200 |
| H | -5.19178200 | -2.73006800 | -1.45125800 |
| H | -4.61871200 | -3.62699200 | -0.33695500 |

### R<sub>3</sub>

|    |             |             |             |
|----|-------------|-------------|-------------|
| O  | 1.69364800  | -0.82324600 | 2.08158300  |
| O  | 3.84837200  | -1.48236800 | 0.63507400  |
| O  | 3.03180900  | 1.10127600  | 0.76764900  |
| O  | 2.81639700  | 0.04683800  | -1.56754500 |
| O  | 0.40241700  | 0.37133500  | 0.05701300  |
| O  | 1.39993500  | -2.02275000 | -0.51558300 |
| Al | 2.12144600  | -0.52682100 | 0.16325500  |
| O  | -1.58226900 | 0.75718100  | -1.90447300 |
| O  | -2.10054100 | 1.68988000  | 0.47753200  |
| O  | -3.33587200 | -0.67396800 | -0.23408100 |
| O  | -1.49703200 | -0.55054100 | 1.85070400  |
| Al | -1.47662300 | -0.03312900 | -0.11805900 |

|   |             |             |             |
|---|-------------|-------------|-------------|
| O | -1.01877300 | -1.72965900 | -0.69297700 |
| H | 2.73019000  | -0.51614100 | -2.35064700 |
| H | 3.49591400  | 0.74491000  | -1.73131400 |
| H | 3.66088000  | 1.63839800  | 0.20662900  |
| H | 4.66039100  | -1.07689400 | 0.97771600  |
| H | 4.07403200  | -2.39686200 | 0.40052100  |
| H | 2.16547400  | -1.43880600 | 2.66488700  |
| H | 0.76926000  | -0.76492400 | 2.36964800  |
| H | 1.79351000  | -2.88854800 | -0.66142800 |
| H | 0.01179700  | -1.99863500 | -0.68238400 |
| H | -1.62531700 | -2.43702000 | -0.99533700 |
| H | -1.86519900 | 0.09944800  | 2.50807200  |
| H | -1.88289500 | -1.41330600 | 2.07234800  |
| H | -4.15103100 | -0.17381400 | -0.09068000 |
| H | -2.34306500 | 1.90287400  | 1.41355900  |
| H | -2.42473400 | 2.39777700  | -0.13924300 |
| H | -2.04164800 | 1.60941000  | -2.11447800 |
| H | -1.37052400 | 0.29226300  | -2.72609600 |
| H | 0.53702700  | 1.32569600  | 0.00222400  |
| H | -3.56723000 | -1.56109500 | -0.63882400 |
| H | 3.05961300  | 1.41611700  | 1.68319100  |
| H | 5.52347900  | 1.99691500  | -1.19564400 |
| O | 4.55926700  | 2.11968500  | -1.17382500 |
| H | 4.41814300  | 3.00414600  | -1.55047700 |
| H | -3.73707600 | -3.85962000 | -0.80479000 |
| O | -3.40854800 | -3.09459000 | -1.30524200 |
| H | -3.71367200 | -3.24826600 | -2.21453500 |
| H | -3.48950300 | 1.54818900  | 3.50062700  |
| O | -2.58229800 | 1.59201700  | 3.15350600  |
| H | -2.10403800 | 2.13843100  | 3.79898300  |
| O | -2.82858700 | 3.15662300  | -1.68286300 |
| H | -2.39101300 | 3.98804200  | -1.93028700 |
| H | -3.75886400 | 3.28896400  | -1.93155300 |

### TS<sub>3</sub>

|   |            |             |             |
|---|------------|-------------|-------------|
| O | 2.30786200 | -0.82623100 | 2.04166000  |
| O | 4.42720000 | -1.49819500 | 0.69295300  |
| O | 2.96193300 | 1.27644900  | 0.68991600  |
| O | 2.75586400 | 0.10412800  | -1.55625600 |
| O | 0.30268800 | 0.40716000  | 0.24712500  |
| O | 1.45172300 | -1.91209000 | -0.42169900 |

|    |             |             |             |
|----|-------------|-------------|-------------|
| Al | 2.03012500  | -0.34055900 | 0.17238600  |
| O  | -1.56814700 | 0.86851900  | -1.78427400 |
| O  | -2.27289800 | 1.56772900  | 0.63221000  |
| O  | -3.38727700 | -0.75453000 | -0.45182700 |
| O  | -1.74101400 | -0.75389300 | 1.78069100  |
| Al | -1.57349300 | -0.08031500 | -0.06820800 |
| O  | -0.98936400 | -1.70119300 | -0.76045200 |
| H  | 2.75088900  | -0.55428300 | -2.26714200 |
| H  | 3.39084800  | 0.83327900  | -1.77077500 |
| H  | 3.54127200  | 1.81934700  | 0.08207600  |
| H  | 5.28230000  | -1.06562700 | 0.84286600  |
| H  | 4.66893400  | -2.40859800 | 0.45955000  |
| H  | 3.16415400  | -1.29326800 | 2.15457700  |
| H  | 1.65882400  | -1.18905300 | 2.66176900  |
| H  | 1.91035300  | -2.75767400 | -0.44194000 |
| H  | 0.02244800  | -1.94986000 | -0.68797000 |
| H  | -1.55003100 | -2.40331200 | -1.15898800 |
| H  | -2.14948100 | -0.20931700 | 2.50176700  |
| H  | -1.92276200 | -1.68650400 | 1.96810000  |
| H  | -4.23909600 | -0.33460800 | -0.26980300 |
| H  | -2.58623200 | 1.68133000  | 1.56720800  |
| H  | -2.58919700 | 2.31681300  | 0.06209500  |
| H  | -2.05127100 | 1.71896100  | -1.94168200 |
| H  | -1.33593000 | 0.47113200  | -2.63505700 |
| H  | 0.34571000  | 1.35384200  | 0.43690400  |
| H  | -3.54665500 | -1.62009300 | -0.92273600 |
| H  | 3.13895400  | 1.51847000  | 1.61181400  |
| H  | 5.33089300  | 2.21388700  | -1.38680000 |
| O  | 4.36193400  | 2.28340300  | -1.34631300 |
| H  | 4.15937000  | 3.13718300  | -1.76374900 |
| H  | -3.53338600 | -3.93171200 | -1.23952100 |
| O  | -3.20740100 | -3.12154300 | -1.66523900 |
| H  | -3.42159800 | -3.23687500 | -2.60571400 |
| H  | -3.85682500 | 1.13785300  | 3.52120500  |
| O  | -2.93129300 | 1.22148300  | 3.23571000  |
| H  | -2.49619000 | 1.69872400  | 3.96149300  |
| O  | -2.92916900 | 3.19356200  | -1.43320900 |
| H  | -2.51546100 | 4.06102600  | -1.57519500 |
| H  | -3.84816600 | 3.31223100  | -1.72660900 |

|    |             |             |             |
|----|-------------|-------------|-------------|
| O  | 2.78397000  | 0.84238800  | -1.75361600 |
| O  | 4.44559500  | -1.12444800 | -2.28451000 |
| O  | 3.00562300  | -0.94912600 | 0.09333700  |
| O  | 2.78421900  | 1.15167900  | 1.57839000  |
| O  | 0.33407000  | -0.25532200 | 0.03063200  |
| O  | 1.11104800  | 2.26672400  | -0.20460700 |
| Al | 1.93816400  | 0.69459300  | -0.05986200 |
| O  | -1.68586500 | -0.01288300 | 1.96105300  |
| O  | -2.03111500 | -1.84586000 | 0.12042500  |
| O  | -3.53679400 | 0.50651000  | -0.04033300 |
| O  | -1.66586900 | -0.26338500 | -1.93933400 |
| Al | -1.62399700 | 0.02787100  | 0.00087500  |
| O  | -1.31125500 | 1.84881600  | -0.11634600 |
| H  | 2.64359900  | 2.00452600  | 2.01744200  |
| H  | 3.46532000  | 0.60957000  | 2.07737800  |
| H  | 3.52067500  | -1.15161000 | 0.91159900  |
| H  | 4.29878000  | -1.75359400 | -3.01015600 |
| H  | 5.40711100  | -0.98079100 | -2.27243000 |
| H  | 3.46874300  | 0.21969400  | -2.14176900 |
| H  | 2.64334100  | 1.59945500  | -2.34258800 |
| H  | 1.49593000  | 3.14592400  | -0.29089800 |
| H  | -0.32312400 | 2.19662800  | -0.16400300 |
| H  | -1.99283700 | 2.55577300  | -0.16096000 |
| H  | -2.00509400 | -1.09354300 | -2.35870300 |
| H  | -1.67913500 | 0.44958400  | -2.59322900 |
| H  | -4.31000900 | -0.07288500 | -0.00995600 |
| H  | -2.27889900 | -2.40220400 | -0.66381700 |
| H  | -2.29531900 | -2.29531600 | 0.96570300  |
| H  | -2.03961300 | -0.77714100 | 2.48130300  |
| H  | -1.67324400 | 0.77468700  | 2.52281200  |
| H  | 0.50806800  | -1.20197100 | 0.12245100  |
| H  | -3.84492100 | 1.45379900  | -0.09418600 |
| H  | 3.52693800  | -1.29504700 | -0.67105900 |
| H  | 5.39633400  | -0.55973300 | 2.43471200  |
| O  | 4.43386200  | -0.69300200 | 2.46903400  |
| H  | 4.28077700  | -1.17610300 | 3.29798000  |
| H  | -4.11115800 | 3.59609600  | -0.98989000 |
| O  | -3.76265500 | 3.16077300  | -0.19450400 |
| H  | -4.10860900 | 3.68790600  | 0.54442800  |
| H  | -3.51717400 | -2.94752500 | -2.64596000 |
| O  | -2.60412900 | -2.78420900 | -2.35569700 |

|   |             |             |             |
|---|-------------|-------------|-------------|
| H | -2.08245500 | -3.47619900 | -2.79432000 |
| O | -2.64794900 | -2.45374800 | 2.68562200  |
| H | -2.13473500 | -3.08421300 | 3.21722000  |
| H | -3.56551100 | -2.57706300 | 2.98136900  |

**R<sub>4</sub>**

|    |             |             |             |
|----|-------------|-------------|-------------|
| O  | -3.31397700 | 1.55156900  | 0.91603500  |
| O  | -4.06192400 | 0.06036600  | -1.06455700 |
| O  | -3.27662400 | -1.70163200 | 0.67221000  |
| O  | 1.27431300  | 0.09308800  | 1.55169100  |
| O  | -1.24857200 | 0.07139900  | -0.97407800 |
| Al | -2.57800600 | -0.02182600 | 0.18878800  |
| O  | 3.30523800  | -1.60208500 | 0.92895500  |
| O  | 4.01539500  | -0.05129100 | -0.99561600 |
| O  | 3.26818900  | 1.74684800  | 0.69293000  |
| Al | 2.57666200  | 0.02952600  | 0.31496400  |
| O  | 1.33148500  | -0.06801500 | -1.06415800 |
| H  | -4.05372300 | -2.14154500 | 0.18911100  |
| H  | -2.87308500 | -2.33617700 | 1.28271000  |
| H  | -4.61265100 | 0.86660300  | -1.19566300 |
| H  | -4.58967800 | -0.72850200 | -1.32567700 |
| H  | -4.09733800 | 2.04685400  | 0.50514700  |
| H  | -2.93310000 | 2.07962300  | 1.63321500  |
| H  | -1.50251200 | 0.18736700  | -1.89855800 |
| H  | 0.30362900  | -0.01524600 | -0.98421000 |
| H  | 1.58822700  | -0.15941500 | -1.99318700 |
| H  | 2.87750800  | 2.36529200  | 1.32836400  |
| H  | 4.04251100  | 2.18170300  | 0.21630700  |
| H  | 4.55254900  | 0.74070000  | -1.24076700 |
| H  | 2.93470500  | -2.11470800 | 1.66294900  |
| H  | 4.08907300  | -2.08719200 | 0.52307400  |
| H  | 1.51009700  | 0.22405500  | 2.47846400  |
| H  | 4.57567100  | -0.85582600 | -1.11967800 |
| H  | -1.54543900 | -0.23085200 | 2.58177100  |
| O  | -1.32671400 | -0.11260600 | 1.64585400  |
| H  | -0.30517600 | -0.03284300 | 1.55591500  |
| O  | -5.22234400 | -2.46546700 | -0.86913000 |
| H  | -6.13249500 | -2.55705900 | -0.53922700 |
| H  | -5.11103400 | -3.18958000 | -1.50813900 |
| H  | -5.18261900 | 3.30648200  | -1.03228700 |
| O  | -5.27830400 | 2.49567700  | -0.50453800 |

|   |             |             |             |
|---|-------------|-------------|-------------|
| H | -6.18999300 | 2.52000900  | -0.16713600 |
| O | 5.23362600  | 2.42819700  | -0.89712700 |
| H | 5.13437300  | 3.12967800  | -1.56270600 |
| H | 6.14852700  | 2.51166300  | -0.57849000 |
| H | 6.20977600  | -2.47216400 | -0.21331200 |
| O | 5.29539200  | -2.45746100 | -0.54375400 |
| H | 5.21823200  | -3.24771200 | -1.10450900 |

**TS<sub>4</sub>**

|    |             |             |             |
|----|-------------|-------------|-------------|
| O  | -2.23907600 | -1.95185500 | -0.25219700 |
| O  | -3.93553200 | 0.04987700  | 0.11324900  |
| O  | -1.88483600 | -0.07327300 | -2.00082700 |
| O  | -2.10678400 | 1.90800300  | -0.33098700 |
| O  | 0.65185900  | 0.01291700  | -0.50041700 |
| O  | -1.29541800 | -0.02586900 | 1.53221800  |
| O  | 3.00713700  | -1.63240000 | 0.90801100  |
| O  | 3.43281100  | 0.00081400  | -1.06542800 |
| O  | 3.02294400  | 1.60309300  | 0.93789700  |
| Al | -2.05368800 | -0.01797300 | -0.07300100 |
| Al | 2.17444400  | -0.00610100 | 0.42922900  |
| H  | -1.60446600 | -2.57061800 | 0.13811100  |
| H  | -3.14668500 | -2.37531100 | -0.22029100 |
| H  | -4.46410400 | 0.88860300  | 0.12111500  |
| H  | -4.52319900 | -0.74912900 | 0.12508900  |
| H  | -1.94884400 | 0.70364700  | -2.57971200 |
| H  | -1.96182300 | -0.88127500 | -2.53384600 |
| H  | -2.97748000 | 2.40156100  | -0.27321200 |
| H  | -1.40154000 | 2.49236600  | -0.01761900 |
| H  | 2.81214900  | 2.12953900  | 1.72363400  |
| H  | 3.75204800  | 2.05906500  | 0.40466600  |
| H  | 3.95371100  | -0.79530400 | -1.32025000 |
| H  | 3.95938200  | 0.79693000  | -1.30798400 |
| H  | 3.73163100  | -2.08624800 | 0.36695600  |
| H  | 2.79005200  | -2.17059800 | 1.68396400  |
| H  | 0.76371300  | 0.01237500  | -1.45747600 |
| H  | -1.85352700 | -0.03816500 | 2.32040800  |
| O  | 1.15867900  | -0.01680700 | 2.01702700  |
| H  | 0.11722000  | -0.01974700 | 1.88713200  |
| H  | 1.40142900  | -0.02122500 | 2.95329600  |
| H  | 5.72144000  | -2.45130300 | -0.62125800 |
| O  | 4.77150300  | -2.44384300 | -0.82902600 |

|   |             |             |             |
|---|-------------|-------------|-------------|
| H | 4.62952100  | -3.23459300 | -1.37605500 |
| O | 4.79452500  | 2.42866300  | -0.78503300 |
| H | 5.74461700  | 2.42196600  | -0.57794700 |
| H | 4.66076000  | 3.23135700  | -1.31652600 |
| H | -4.95663100 | 3.15362100  | 0.72815100  |
| O | -4.65349000 | 2.65705800  | -0.05123900 |
| H | -5.18435700 | 3.00408700  | -0.78855500 |
| H | -5.19970800 | -2.95522400 | 0.75310300  |
| O | -4.84834000 | -2.49414100 | -0.02790800 |
| H | -5.39299500 | -2.81133300 | -0.76859100 |

**P<sub>4</sub>**

|    |             |             |             |
|----|-------------|-------------|-------------|
| O  | 1.82667500  | 1.93119200  | -0.33532800 |
| O  | 3.55661300  | -0.00018300 | 0.03573500  |
| O  | 1.71482300  | -0.00199200 | -2.15331300 |
| O  | 1.82675000  | -1.93178000 | -0.33485500 |
| O  | -0.31425800 | -0.00120100 | -0.35063700 |
| O  | 1.35707700  | -0.00080100 | 1.69043000  |
| O  | -2.75436900 | 1.68132100  | 0.93714300  |
| O  | -2.98694800 | -0.00007600 | -1.00950900 |
| O  | -2.75634000 | -1.67995900 | 0.93896900  |
| Al | 1.63625100  | 0.00030500  | -0.15237800 |
| Al | -1.93001300 | -0.00012300 | 0.64154000  |
| H  | 1.13545800  | 2.58563300  | -0.16418300 |
| H  | 2.71938900  | 2.38264800  | -0.24319500 |
| H  | 4.11947500  | -0.81313800 | 0.04493200  |
| H  | 4.11943500  | 0.81261400  | 0.04562000  |
| H  | 1.90807700  | -0.78789200 | -2.68959700 |
| H  | 1.91177600  | 0.78138000  | -2.69197100 |
| H  | 2.71980600  | -2.38242700 | -0.24460300 |
| H  | 1.13689000  | -2.58606500 | -0.15761700 |
| H  | -2.63699900 | -2.18561000 | 1.75849600  |
| H  | -3.44714200 | -2.12016000 | 0.35410500  |
| H  | -3.50616300 | 0.79543200  | -1.28589700 |
| H  | -3.50673700 | -0.79521000 | -1.28561400 |
| H  | -3.44471000 | 2.12168000  | 0.35207900  |
| H  | -2.63429100 | 2.18756100  | 1.75619000  |
| H  | -0.51911700 | -0.00214200 | -1.29719200 |
| H  | 2.02520500  | -0.00216000 | 2.38863200  |
| O  | -1.05497400 | 0.00108300  | 2.18769700  |
| H  | 0.37971600  | 0.00019000  | 2.06981100  |



|   |             |             |             |
|---|-------------|-------------|-------------|
| H | -1.40237500 | 0.00134900  | 3.08714400  |
| H | -5.37442600 | 2.36098000  | -0.82921600 |
| O | -4.41203800 | 2.38295800  | -0.96925900 |
| H | -4.26331400 | 3.15970700  | -1.53463600 |
| O | -4.41443400 | -2.38273000 | -0.96584300 |
| H | -5.37681000 | -2.35962800 | -0.82591700 |
| H | -4.26635900 | -3.16058000 | -1.52987700 |
| H | 4.71220500  | -3.05501900 | 0.74534300  |
| O | 4.38110400  | -2.59971400 | -0.04769900 |
| H | 4.90913800  | -2.96237200 | -0.77952600 |
| H | 4.70831000  | 3.05676500  | 0.74839200  |
| O | 4.37851500  | 2.60170200  | -0.04533800 |
| H | 4.90688700  | 2.96553100  | -0.77635100 |

**R<sub>5</sub>**

|    |             |             |             |
|----|-------------|-------------|-------------|
| O  | 3.10655700  | 1.62704300  | 0.87897700  |
| O  | 3.73207300  | -0.93752300 | 0.70421700  |
| O  | 3.31673200  | -0.07426800 | -1.68481300 |
| O  | -1.46475100 | 0.63495000  | -1.45586500 |
| O  | 1.12924900  | -0.92802300 | 0.77889400  |
| Al | 2.36088200  | 0.20508800  | -0.06394400 |
| O  | -2.62691100 | -2.01316400 | -1.40982100 |
| O  | -4.05574700 | 0.16350600  | -1.91842100 |
| O  | -4.31542900 | -1.07761100 | 0.51358400  |
| O  | -3.35613000 | 1.36069700  | 0.44531900  |
| Al | -2.77921600 | -0.29524200 | -0.41954000 |
| O  | -1.48049600 | -0.82625300 | 0.71296400  |
| H  | 3.02561300  | 0.26152900  | -2.54480600 |
| H  | 4.22570400  | -0.49075900 | -1.75791700 |
| H  | 4.57661600  | -1.15126000 | 0.24309100  |
| H  | 3.54581600  | -1.61736900 | 1.40586800  |
| H  | 3.84820900  | 1.47372600  | 1.48271400  |
| H  | 2.94800600  | 2.66160000  | 0.81629800  |
| H  | 1.39440200  | -1.64643200 | 1.39402100  |
| H  | 0.10856000  | -0.84592700 | 0.73348200  |
| H  | -1.74371200 | -1.02489200 | 1.61860500  |
| H  | -2.81151300 | 2.15338300  | 0.54494100  |
| H  | -4.16367100 | 1.43912000  | 1.01740800  |
| H  | -4.94871500 | -0.55814000 | 1.07781100  |
| H  | -4.20950100 | 1.06691000  | -2.23857900 |
| H  | -4.85746600 | -0.34200100 | -2.12925800 |

|   |             |             |             |
|---|-------------|-------------|-------------|
| H | -2.91102500 | -2.27154900 | -2.30047600 |
| H | -2.03581100 | -2.69946600 | -1.06573100 |
| H | -1.53387300 | 0.79851100  | -2.40603400 |
| H | -4.52616100 | -2.02073400 | 0.57810100  |
| H | 1.13922900  | 1.99309000  | -1.12983000 |
| O | 1.00592100  | 1.07375100  | -0.86977500 |
| H | -0.47914800 | 0.77407000  | -1.17631800 |
| H | 2.43327500  | 4.63235900  | 1.44151100  |
| O | 2.76399600  | 4.10258300  | 0.70122100  |
| H | 3.39608900  | 4.66394900  | 0.22740700  |
| O | 5.65357700  | -1.22819700 | -1.26951400 |
| H | 6.48440000  | -0.72506500 | -1.29694000 |
| H | 5.87590100  | -2.09816200 | -1.64042300 |
| O | 2.62687300  | -2.64087900 | 2.43349800  |
| H | 2.70449100  | -2.50234700 | 3.39127600  |
| H | 2.72242000  | -3.59914000 | 2.31150900  |
| H | -6.48839600 | 1.18518300  | 1.57269500  |
| O | -5.61545800 | 0.86085200  | 1.85111000  |
| H | -5.64184100 | 0.88211000  | 2.82226900  |

**TS<sub>5</sub>**

|    |             |             |             |
|----|-------------|-------------|-------------|
| O  | -3.15088900 | 1.66081000  | -0.79891600 |
| O  | -3.83060700 | -0.89645900 | -0.63840400 |
| O  | -3.27861100 | -0.08591900 | 1.74007400  |
| O  | 1.47277300  | 0.55047900  | 1.32569900  |
| O  | -1.23967500 | -0.92871600 | -0.85397700 |
| Al | -2.40030400 | 0.20414200  | 0.07986200  |
| O  | 2.84039900  | -1.88766800 | 1.34068100  |
| O  | 4.43430700  | -0.09321700 | 2.29770400  |
| O  | 4.26906700  | -1.02696900 | -0.71046200 |
| O  | 3.40123600  | 1.33424300  | -0.33827200 |
| Al | 2.68566500  | -0.35838700 | 0.18059700  |
| O  | 1.38727700  | -0.85977700 | -0.91547500 |
| H  | -2.94052800 | 0.23010600  | 2.59032200  |
| H  | -4.19034000 | -0.48994000 | 1.85058900  |
| H  | -4.65519200 | -1.10383100 | -0.13957500 |
| H  | -3.69174700 | -1.56717100 | -1.35905800 |
| H  | -3.92268900 | 1.53582000  | -1.37078300 |
| H  | -2.95466000 | 2.69110400  | -0.73854900 |
| H  | -1.54904900 | -1.63374100 | -1.46668900 |
| H  | -0.22373200 | -0.85966600 | -0.86442200 |

|   |             |             |             |
|---|-------------|-------------|-------------|
| H | 1.61928100  | -1.15489800 | -1.80341000 |
| H | 3.06478100  | 2.18531600  | -0.02467300 |
| H | 4.19585800  | 1.47162200  | -0.92289900 |
| H | 4.89568100  | -0.47721200 | -1.25419800 |
| H | 4.38131400  | 0.35764700  | 3.15471300  |
| H | 5.38776100  | -0.17935800 | 2.14501100  |
| H | 3.45842200  | -1.83153500 | 2.09554200  |
| H | 2.29468600  | -2.68710900 | 1.37763300  |
| H | 1.59990500  | 0.69305700  | 2.27276500  |
| H | 4.53761100  | -1.95768400 | -0.74186400 |
| H | -1.08729000 | 1.95679800  | 1.09282700  |
| O | -0.98605300 | 1.03023100  | 0.84260900  |
| H | 0.46510200  | 0.71412300  | 1.09420700  |
| H | -2.38638400 | 4.63604400  | -1.37235400 |
| O | -2.71164200 | 4.11710000  | -0.62184900 |
| H | -3.31108600 | 4.69810700  | -0.12935100 |
| O | -5.65032900 | -1.19313300 | 1.42735000  |
| H | -6.47019100 | -0.67783400 | 1.50852800  |
| H | -5.86712900 | -2.06724200 | 1.79194900  |
| O | -2.82341600 | -2.58907600 | -2.44316100 |
| H | -2.94150500 | -2.43926400 | -3.39524200 |
| H | -2.91724800 | -3.54844800 | -2.32756200 |
| H | 6.45049900  | 1.27482100  | -1.63049600 |
| O | 5.55617900  | 1.00383200  | -1.89857400 |
| H | 5.52803200  | 1.14947400  | -2.85914200 |

**P<sub>5</sub>**

|    |             |             |             |
|----|-------------|-------------|-------------|
| O  | 3.36367900  | -0.95888500 | -1.33455000 |
| O  | 3.73789400  | 1.21314700  | 0.14991200  |
| O  | 3.01562800  | -0.74947900 | 1.72032900  |
| O  | -1.43311500 | -1.57990000 | 0.36854800  |
| O  | 0.99542000  | 0.94681000  | -0.11292200 |
| Al | 2.39199600  | -0.13725000 | 0.05324100  |
| O  | -3.70756100 | -0.74666400 | 1.65644500  |
| O  | -6.05167900 | 0.41969400  | 1.66859500  |
| O  | -4.18828900 | 0.79976200  | -0.34390900 |
| O  | -3.51418000 | -1.50108900 | -1.38975900 |
| Al | -2.77172000 | -0.44953000 | 0.03461400  |
| O  | -1.57085800 | 0.87750000  | -0.47109600 |
| H  | 2.65952300  | -1.51039300 | 2.20037200  |
| H  | 3.81267600  | -0.35984400 | 2.20897800  |

|   |             |             |             |
|---|-------------|-------------|-------------|
| H | 4.42027900  | 1.19631700  | 0.85252600  |
| H | 3.84534500  | 2.09899000  | -0.37573200 |
| H | 4.18695000  | -0.59885800 | -1.69605700 |
| H | 3.19500300  | -1.88726200 | -1.69495200 |
| H | 1.17519400  | 1.88696500  | 0.00707700  |
| H | -0.54885100 | 0.85081400  | -0.34260200 |
| H | -1.85129700 | 1.72369700  | -0.88227500 |
| H | -3.15738700 | -2.35519600 | -1.68118100 |
| H | -4.31155700 | -1.29787600 | -1.90606900 |
| H | -4.02769300 | 1.65804300  | -0.82908300 |
| H | -6.87112900 | -0.09231200 | 1.56087400  |
| H | -6.27563300 | 1.12230700  | 2.30180400  |
| H | -4.62546700 | -0.38267100 | 1.85920700  |
| H | -3.38886000 | -1.27133900 | 2.40593100  |
| H | -1.59196100 | -2.41292900 | 0.82658300  |
| H | -5.02199100 | 0.85425300  | 0.18000500  |
| H | 1.40574700  | -2.46364700 | -0.54408600 |
| O | 1.19831900  | -1.65443600 | -0.03809700 |
| H | 0.20034100  | -1.58823800 | 0.10441300  |
| H | 2.31224400  | -3.61175400 | -2.80150300 |
| O | 2.62191600  | -3.37769500 | -1.91182100 |
| H | 3.17350900  | -4.12711600 | -1.63311400 |
| O | 5.11095300  | 0.51971800  | 2.55979900  |
| H | 5.98365800  | 0.09385300  | 2.58765900  |
| H | 5.08971100  | 1.10695100  | 3.33309800  |
| O | 3.99604600  | 3.40497100  | -1.09321800 |
| H | 4.44658200  | 3.50592600  | -1.94410600 |
| H | 4.10206400  | 4.24956700  | -0.63198500 |
| H | -3.28808700 | 3.07495600  | -2.50194400 |
| O | -3.17851600 | 2.93083200  | -1.54785400 |
| H | -3.27775200 | 3.81065000  | -1.14917600 |

**R<sub>6</sub>**

|   |             |             |             |
|---|-------------|-------------|-------------|
| O | -1.98897400 | -1.64661000 | -0.76151900 |
| O | -3.66948500 | -0.13075300 | 0.49748000  |
| O | -2.03583600 | 0.93148400  | -1.58531100 |
| O | -1.87203100 | 1.88331700  | 0.82212300  |
| O | 0.18694300  | 0.05781700  | -0.22472100 |
| O | -1.34077500 | -0.57740700 | 1.84260000  |
| O | 2.59611300  | -2.04028100 | 0.11510100  |
| O | 2.82649300  | 0.27840900  | -1.00723400 |

|    |             |             |             |
|----|-------------|-------------|-------------|
| O  | 2.78629400  | 1.02699900  | 1.46289400  |
| Al | -1.74735200 | 0.06251700  | 0.14306800  |
| Al | 1.84952900  | -0.35552100 | 0.56722600  |
| H  | -1.28018000 | -2.25153600 | -1.01866900 |
| H  | -2.85769800 | -2.14420700 | -0.77557200 |
| H  | -4.23574700 | 0.51392600  | 0.94718000  |
| H  | -4.22118700 | -0.91203700 | 0.22738200  |
| H  | -2.32060900 | 1.88357300  | -1.67366100 |
| H  | -2.30081900 | 0.45218400  | -2.38519500 |
| H  | -2.16589900 | 2.67438600  | 0.29792000  |
| H  | -1.71184100 | 2.13647800  | 1.74349000  |
| H  | 2.71376200  | 1.17684500  | 2.41864400  |
| H  | 3.47312400  | 1.64366000  | 1.06370000  |
| H  | 3.28261600  | -0.35338400 | -1.61652000 |
| H  | 3.38060100  | 1.09689200  | -0.97053600 |
| H  | 3.22808500  | -2.22848900 | -0.64455800 |
| H  | 2.49570200  | -2.82804600 | 0.67247700  |
| H  | 0.32824000  | 0.47950300  | -1.08466300 |
| H  | -1.96081400 | -0.93294900 | 2.49369300  |
| O  | 1.06627700  | -0.95413200 | 2.05163900  |
| H  | -0.33125300 | -0.80153500 | 2.08206200  |
| H  | 1.46549400  | -1.32890500 | 2.84552600  |
| H  | 5.07706800  | -2.03005100 | -1.95841400 |
| O  | 4.10909000  | -1.96289600 | -2.02734400 |
| H  | 3.88709900  | -2.43965300 | -2.84494100 |
| O  | 4.40085200  | 2.38054100  | -0.09904600 |
| H  | 5.36465700  | 2.26293600  | -0.04102300 |
| H  | 4.27898300  | 3.32657200  | -0.28591900 |
| H  | -3.62701800 | 3.80541300  | -1.22887300 |
| O  | -2.70458800 | 3.50175800  | -1.17324700 |
| H  | -2.18314100 | 4.24272900  | -1.52524000 |
| H  | -4.76776600 | -3.22070700 | 0.06964800  |
| O  | -4.51259000 | -2.48266700 | -0.51033600 |
| H  | -5.12203000 | -2.53917500 | -1.26639900 |

**TS<sub>6</sub>**

|   |             |             |             |
|---|-------------|-------------|-------------|
| O | -2.28466600 | -1.95997800 | 0.18895800  |
| O | -2.17500700 | -0.24209200 | 2.15626900  |
| O | -3.25071000 | 0.26374100  | -0.67609400 |
| O | -1.54863200 | 1.79276200  | 0.47479400  |
| O | -0.14454000 | -0.43378800 | -0.60949200 |

|    |             |             |             |
|----|-------------|-------------|-------------|
| O  | 0.59890900  | 0.65946500  | 1.42105000  |
| O  | 1.99679900  | -1.69939600 | 1.04710700  |
| O  | 3.37653000  | 0.64809500  | 0.76193300  |
| O  | 2.44349500  | -1.00078900 | -1.38775400 |
| O  | 1.78672500  | 1.58026400  | -1.07273900 |
| Al | -1.68940700 | -0.08697400 | 0.31477000  |
| Al | 1.64197700  | 0.00138200  | 0.10483600  |
| H  | -1.78183100 | -2.76463000 | 0.38304500  |
| H  | -3.15308500 | -2.21924700 | -0.24638300 |
| H  | -2.67240600 | -0.97605300 | 2.55419100  |
| H  | -2.03059900 | 0.44020500  | 2.83265100  |
| H  | -3.90377100 | -0.41705100 | -0.98496200 |
| H  | -3.61511300 | 1.18546600  | -0.79705300 |
| H  | -0.72277000 | 2.13578500  | 0.85970500  |
| H  | -2.20986000 | 2.47952900  | 0.19473600  |
| H  | 1.15793200  | 1.86560100  | -1.74875000 |
| H  | 2.52932200  | 2.24364200  | -1.01566500 |
| H  | 2.75830600  | -0.57829300 | -2.20043400 |
| H  | 2.92201500  | -1.86702400 | -1.27984900 |
| H  | 3.81914700  | 1.48539300  | 0.46416700  |
| H  | 3.92273700  | 0.23225900  | 1.44429600  |
| H  | 2.57021600  | -2.43832600 | 0.71297000  |
| H  | 1.77229100  | -1.85754400 | 1.97478900  |
| H  | -0.19327800 | -0.99811500 | -1.39223500 |
| H  | 0.96541000  | 0.97112400  | 2.25536000  |
| O  | 3.54194800  | -3.29554700 | -0.49366800 |
| H  | 3.26293000  | -4.16939000 | -0.81457900 |
| H  | 4.50100300  | -3.37970500 | -0.35771500 |
| H  | 4.02268000  | 3.80246000  | -0.01967000 |
| O  | 4.02077700  | 2.95068200  | -0.48798100 |
| H  | 4.77130400  | 3.00433200  | -1.10386200 |
| H  | -3.73458900 | 3.45241800  | -1.40779800 |
| O  | -3.73831500 | 2.90075800  | -0.60706400 |
| H  | -4.46186900 | 3.25895300  | -0.06440300 |
| O  | -4.59345600 | -2.04958600 | -1.09899400 |
| H  | -5.43607200 | -2.23827900 | -0.65032000 |
| H  | -4.68232200 | -2.45755400 | -1.97772200 |

**P<sub>s</sub>6**

|   |            |             |            |
|---|------------|-------------|------------|
| O | 1.84506600 | 1.71194200  | 0.99563600 |
| O | 2.48968100 | -0.64228100 | 2.03048300 |

|    |             |             |             |
|----|-------------|-------------|-------------|
| O  | 2.97640700  | 0.13277700  | -0.72951300 |
| O  | 1.64434800  | -2.01174000 | -0.08812400 |
| O  | 0.11713800  | 0.31605800  | -0.87118700 |
| O  | -0.20148100 | -0.32354100 | 1.30770500  |
| O  | -1.86511000 | 1.85850400  | 0.72443700  |
| O  | -3.02688300 | -0.55325200 | 1.09745600  |
| O  | -2.61907300 | 0.73405800  | -1.47068400 |
| O  | -1.73454100 | -1.74052700 | -0.78561100 |
| Al | 1.44934100  | -0.11641300 | 0.40840100  |
| Al | -1.53369000 | 0.05798200  | 0.00086500  |
| H  | 1.35322500  | 2.26297000  | 1.61832300  |
| H  | 2.61517200  | 2.24047200  | 0.63437500  |
| H  | 2.86277600  | -0.02830000 | 2.68240900  |
| H  | 2.82875400  | -1.52702200 | 2.23752200  |
| H  | 3.52399400  | 0.95646500  | -0.75717400 |
| H  | 3.44263200  | -0.59923500 | -1.20480700 |
| H  | 1.12253500  | -2.75857900 | 0.23491000  |
| H  | 2.37825700  | -2.34778900 | -0.67879700 |
| H  | -1.24974800 | -2.06339900 | -1.55761700 |
| H  | -2.46192000 | -2.38158500 | -0.55615400 |
| H  | -2.96418200 | 0.20940800  | -2.20770200 |
| H  | -3.02926700 | 1.64049900  | -1.50523000 |
| H  | -3.49292300 | -1.42677100 | 0.98568000  |
| H  | -3.55029900 | -0.00072900 | 1.69626700  |
| H  | -2.42341500 | 2.54654500  | 0.26474100  |
| H  | -1.66792200 | 2.16523800  | 1.61991300  |
| H  | 0.26353000  | 0.71541100  | -1.73505800 |
| H  | -0.33913500 | -0.68631600 | 2.18993800  |
| O  | -3.44011000 | 3.23790500  | -0.95214500 |
| H  | -3.13643300 | 4.00511600  | -1.46653300 |
| H  | -4.37086600 | 3.43075300  | -0.74519600 |
| H  | -3.79106800 | -3.76313000 | 0.87686500  |
| O  | -3.85938800 | -2.97895700 | 0.30597300  |
| H  | -4.70193900 | -3.09091900 | -0.16709000 |
| H  | 3.70151100  | -2.53768200 | -2.61963700 |
| O  | 3.76480000  | -2.29962000 | -1.67928400 |
| H  | 4.58681700  | -2.71991800 | -1.37356800 |
| O  | 4.00485000  | 2.61539100  | -0.26674400 |
| H  | 4.85041900  | 2.73997900  | 0.19730700  |
| H  | 3.98040200  | 3.32438000  | -0.93134600 |
